# Supplementary material
Source: PubMed Central journal article supplement (PMC6761559)
Supplement: AAC.01166-19-s0001.pdf [file AAC.01166-19-s0001.pdf]

## Supplementary Materials

Table S1: Antimicrobial susceptibility of the isolates LEV1449/17Ec and 39741

|              | MIC mg/l |     |     |     |       |      |     |     |       |       |
|--------------|----------|-----|-----|-----|-------|------|-----|-----|-------|-------|
|              | SAM      | TZP | CAZ | ATM | MEM   | GEN  | AMK | CST | CIP   | TGC   |
| LEV1449/17Ec | 1        | 2   | 4   | 16  | 0.125 | 0.25 | 0.5 | 16  | 0.063 | 0.063 |
| 39741        | 1        | 2   | 4   | 16  | 0.125 | 0.25 | 0.5 | 16  | 0.063 | 0.063 |

SAM, ampicillin-sulbactam; TZP, piperacillin-tazobactam; CAZ, ceftazidime; ATM, aztreonam; MEM, meropenem; GEN, gentamicin; AMK, amikacin; CST, colistin; CIP, ciprofloxacin; TGC, tigecycline.

Table S2: Key genomic features of the two sequenced strains: LEV1449/17Ec and 39741

| Strain ID    | Position      | Antibiotic Resistance genes  | Virulence genes       | Virulence factor          | Virulence factor class |
|--------------|---------------|------------------------------|-----------------------|---------------------------|------------------------|
| 39741        | EH_chromosome | <i>bla</i> <sub>ADC-6</sub>  | <i>ompA</i>           | Outer membrane protein    | Adherence              |
|              |               |                              | <i>adeF-G</i>         | Efflux pump               | Biofilm formation      |
|              |               |                              | <i>bap</i>            | Biofil associated protein |                        |
|              |               |                              | <i>csuA-D</i>         | Csu pili                  |                        |
|              |               | <i>bla</i> <sub>OXA-67</sub> | <i>lpxA/B/C/D/L/M</i> | LPS                       | Immune invasion        |
|              |               |                              | <i>abaI, abaR</i>     | Quorum sensing            | Regulation             |
|              | <i>pbpG</i>   |                              | PbpG                  | Serum resistance          |                        |
|              | pEH_mcr4.3    | <i>mcr-4.3</i>               |                       |                           |                        |
|              | pEH_gr3       |                              |                       |                           |                        |
|              | pEH_gr13      |                              |                       |                           |                        |
| LEV1449/17Ec | EC_chromosome | <i>bla</i> <sub>ADC-6</sub>  | <i>ompA</i>           | Outer membrane protein    | Adherence              |
|              |               |                              | <i>adeF-G</i>         | Efflux pump               | Biofilm formation      |
|              |               |                              | <i>bap</i>            | Biofil associated protein |                        |
|              |               |                              | <i>csuA-D</i>         | Csu pili                  |                        |
|              |               | <i>bla</i> <sub>OXA-67</sub> | <i>lpxA/B/C/D/L/M</i> | LPS                       | Immune invasion        |
|              |               |                              | <i>abaI, abaR</i>     | Quorum sensing            | Regulation             |
|              | <i>pbpG</i>   |                              | PbpG                  | Serum resistance          |                        |
|              | pEC_mcr4.3    | <i>mcr-4.3</i>               |                       |                           |                        |
|              | pEC_gr6       |                              |                       |                           |                        |
|              | pEC_gr13      |                              |                       |                           |                        |

\*Antibiotic resistance genes was detected using the ResFinder Databas and AMRFinder, while virulencegenes,factor,and class was detected using the VFDB database.

Table S3: Non-clustered SNPs between *A. baumannii* LEV1449/17Ec and 39741's core genomes.

| PROKKA name                                               | LEV1449/17Ec number | SNP position | Gene product length (AA) | AA substitution |
|-----------------------------------------------------------|---------------------|--------------|--------------------------|-----------------|
| *                                                         | -                   | A40727T      | -                        | -               |
| L-carnitine/gamma-butyrobetaine antiporter                | -                   | A41475T      | 506                      | T235T           |
| hypothetical protein                                      | -                   | A61927T      | 292                      | M177L           |
| Aspartate/glutamate leucyltransferase                     | 2.3.2.29            | G63085C      | 272                      | G205R           |
| hypothetical protein                                      | -                   | T114607A     | 311                      | L49Q            |
| Methionine synthase                                       | 2.1.1.13            | A180632G     | 1229                     | D644G           |
| hypothetical protein                                      | -                   | T186284G     | 516                      | A487A           |
| Sulfate adenylyltransferase subunit 2                     | 2.7.7.4             | G216162C     | 303                      | D288H           |
| hypothetical protein                                      | -                   | C278147T     | 383                      | P132S           |
| hypothetical protein                                      | -                   | A294681T     | 1149                     | G954G           |
| Chromosome partition protein Smc                          | -                   | T304306C     | 187                      | Y129H           |
| putative HTH-type transcriptional regulator               | -                   | G312338A     | 297                      | L234L           |
| hypothetical protein                                      | -                   | T351606A     | 311                      | L49Q            |
| *                                                         | -                   | C358942T     | -                        | -               |
| 3-(3-hydroxy-phenyl)propionate transporter                | -                   | G359174C     | 411                      | G77R            |
| *                                                         | -                   | C413135T     | -                        | -               |
| Porin-like protein NicP                                   | -                   | G433536C     | 421                      | E284Q           |
| Porin-like protein NicP                                   | -                   | G433542A     | 421                      | V282M           |
| putative signaling protein                                | -                   | G491397A     | 402                      | D8N             |
| hypothetical protein                                      | -                   | T534668A     | 311                      | L49Q            |
| 2-nitroimidazole transporter                              | -                   | G538792T     | 258                      | V207F           |
| Bifunctional protein PaaZ                                 | -                   | A561926G     | 701                      | K367E           |
| Bifunctional protein PaaZ                                 | -                   | T562321A     | 701                      | L235Q           |
| Bifunctional protein PaaZ                                 | -                   | A562330T     | 701                      | N232I           |
| hypothetical protein                                      | -                   | G635821A     | 1161                     | G1134G          |
| HTH-type transcriptional regulator DmlR                   | -                   | T640228G     | 314                      | W268G           |
| hypothetical protein                                      | -                   | T665414A     | 311                      | L49Q            |
| hypothetical protein                                      | -                   | G675173T     | 454                      | R363L           |
| *                                                         | -                   | A690123T     | -                        | -               |
| Acetyl-S-ACP:malonate ACP transferase                     | 2.3.1.187           | C708824T     | 560                      | T344M           |
| Serine acetyltransferase                                  | 2.3.1.30            | T752358C     | 272                      | C77R            |
| tRNA (cytidine/uridine-2'-O)-methyltransferase TrmJ       | 2.1.1.200           | T753395C     | 280                      | A8A             |
| DNA polymerase III subunit alpha                          | 2.7.7.7             | C755062A     | 1188                     | I645I           |
| LL-diaminopimelate aminotransferase                       | 2.6.1.83            | A766687G     | 409                      | E166G           |
| Bifunctional uridylyltransferase/uridylyl-removing enzyme | -                   | A768979T     | 888                      | A279A           |
| Bifunctional uridylyltransferase/uridylyl-removing enzyme | -                   | T769326C     | 888                      | C164R           |
| Ribosome-binding ATPase YchF                              | -                   | C775604T     | 364                      | A258V           |
| Glutamate/aspartate import permease protein GltK          | -                   | C787354T     | 226                      | I36I            |
| *                                                         | -                   | A813563G     | -                        | -               |
| Transketolase 1                                           | 2.2.1.1             | A825809G     | 663                      | L384L           |
| Sporulation initiation inhibitor protein Soj              | 3.6.-.-             | T860696C     | 261                      | F118F           |
| Tetraacyldisaccharide 4'-kinase                           | 2.7.1.130           | C865327A     | 337                      | H155N           |
| N(2)-citryl-N(6)-acetyl-N(6)-hydroxylysine synthase       | 6.3.2.38            | C936464T     | 595                      | H562Y           |
| Aerobactin synthase                                       | 6.3.2.39            | C940834G     | 614                      | L458V           |
| Putative 4-hydroxy-4-methyl-2-oxoglutarate aldolase       | 4.1.3.17            | T944587C     | 206                      | N198N           |
| Ferric aerobactin receptor                                | -                   | A946709G     | 770                      | G668G           |
| DNA-binding transcriptional regulator NtrC                | -                   | A1009011T    | 424                      | S152S           |
| hypothetical protein                                      | -                   | T1014723G    | 306                      | C90G            |
| *                                                         | -                   | T1017149G    | -                        | -               |
| Chromate transport protein                                | -                   | A1018036T    | 450                      | L170L           |
| Regulatory protein PchR                                   | -                   | T1045249A    | 329                      | F316Y           |
| Polyphosphate kinase                                      | 2.7.4.1             | T1066831A    | 503                      | *503K           |
| Outer membrane usher protein HtrE                         | -                   | T1086289C    | 854                      | G626G           |
| NAD-dependent glycerol dehydrogenase                      | 1.1.1.6             | G1104521A    | 255                      | V185M           |
| HTH-type transcriptional repressor Bm3R1                  | -                   | C1106508T    | 190                      | A76V            |

|                                                                                                   |            |           |      |        |
|---------------------------------------------------------------------------------------------------|------------|-----------|------|--------|
| NADH oxidase                                                                                      | 1.-.-.-    | C1113950T | 413  | A264V  |
| Putative tartrate transporter                                                                     | -          | C1120152A | 435  | T252N  |
| Flavin-dependent monooxygenase, oxygenase subunit HsaA                                            | 1.14.14.12 | G1144378C | 389  | R271P  |
| 3-oxoadipate enol-lactonase 2                                                                     | 3.1.1.24   | G1171636A | 262  | Q12Q   |
| hypothetical protein                                                                              | -          | G1199192A | 507  | V1M    |
| hypothetical protein                                                                              | -          | C1199672G | 507  | R161G  |
| putative TonB-dependent receptor BfrD                                                             | -          | T1212300A | 700  | V22E   |
| *                                                                                                 | -          | A1224152G | -    | -      |
| *                                                                                                 | -          | A1233857G | -    | -      |
| Phosphoenolpyruvate-protein phosphotransferase                                                    | 2.7.3.9    | G1234612A | 953  | W199*  |
| Sulfurtransferase TusE                                                                            | 2.8.1.-    | C1290488A | 104  | T15K   |
| Nitrite reductase [NAD(P)H]                                                                       | 1.7.1.4    | T1305586A | 849  | T825T  |
| hypothetical protein                                                                              | -          | G1366811C | 145  | G59A   |
| putative ABC transporter ATP-binding protein YheS                                                 | -          | G1393082T | 528  | D229Y  |
| DNA mismatch repair protein MutL                                                                  | -          | C1449583T | 651  | L189L  |
| hypothetical protein                                                                              | -          | C1456879T | 143  | C8C    |
| Inner membrane transport protein YdhP                                                             | -          | C1457982T | 400  | G284G  |
| Translocation and assembly module subunit TamB                                                    | -          | A1467698C | 1502 | S118R  |
| *                                                                                                 | -          | A1486416T | -    | -      |
| Bifunctional purine biosynthesis protein PurH                                                     | -          | T1532225A | 525  | F211L  |
| hypothetical protein                                                                              | -          | A1553974T | 185  | Q103L  |
| *                                                                                                 | -          | A1575783T | -    | -      |
| HTH-type transcriptional regulator NorG                                                           | -          | T1640184A | 487  | L276Q  |
| Multidrug resistance protein MdtE                                                                 | -          | C1645553T | 407  | P391L  |
|                                                                                                   |            |           |      |        |
| NADP-dependent malic enzyme                                                                       | 1.1.1.40   | G1687532T | 757  | G682V  |
| *                                                                                                 | -          | C1787008T | -    | -      |
| *                                                                                                 | -          | C1797244G | -    | -      |
| Deoxyribodipyrimidine photo-lyase                                                                 | 4.1.99.3   | T1840762C | 481  | S30P   |
| hypothetical protein                                                                              | -          | A1846879T | 615  | H565L  |
| Putative monooxygenase                                                                            | 1.13.12.-  | C1851661T | 349  | T106I  |
| Undecaprenyl phosphate-alpha-4-amino-4-deoxy-L-arabinose arabinosyl transferase                   | 2.4.2.43   | A1947527C | 549  | T194T  |
| D-serine/D-alanine/glycine transporter                                                            | -          | A1959553T | 493  | N13Y   |
| Sulfur carrier protein FdhD                                                                       | -          | T1965603G | 121  | *121E  |
| hypothetical protein                                                                              | -          | T1975755C | 169  | Y29H   |
| Multidrug resistance protein MexB                                                                 | -          | T1992006C | 1032 | V400A  |
| hypothetical protein                                                                              | -          | A2032807G | 7535 | I6861V |
| Transcriptional regulatory protein QseB                                                           | -          | T2112744A | 225  | D181E  |
| putative NTE family protein                                                                       | -          | T2119673A | 306  | R199R  |
| hypothetical protein                                                                              | -          | C2150911T | 115  | S63F   |
| Putative aminoacrylate hydrolase RutD                                                             | 3.5.1.-    | C2191038A | 269  | A14D   |
| putative thiol:disulfide interchange protein DsbC                                                 | -          | C2199683T | 237  | S44L   |
| Outer membrane protein Omp38                                                                      | -          | G2217125A | 357  | K96K   |
| hypothetical protein                                                                              | -          | A2250197T | 292  | H223L  |
| hypothetical protein                                                                              | -          | A2259813C | 481  | K73Q   |
| *                                                                                                 | -          | C2316998T | -    | -      |
| *                                                                                                 | -          | T2317000C | -    | -      |
| hypothetical protein                                                                              | -          | A2369343T | 224  | N43Y   |
| 8-oxo-dGTP diphosphatase                                                                          | 3.6.1.55   | G2427804A | 134  | V1V    |
| HTH-type transcriptional regulator GltR                                                           | -          | C2459431A | 289  | Q249K  |
| 1-(5-phosphoribosyl)-5-[(5-phosphoribosylamino)methylideneamino]imidazole-4-carboxamide isomerase | 5.3.1.16   | G2612892A | 244  | A36T   |
| hypothetical protein                                                                              | -          | A2621376G | 213  | N203S  |
| *                                                                                                 | -          | G2636798C | -    | -      |
| hypothetical protein                                                                              | -          | A2645393G | 664  | T643A  |
| hypothetical protein                                                                              | -          | A2645682G | 664  | K546K  |
| hypothetical protein                                                                              | -          | G2645968A | 664  | G451D  |

|                                                              |           |           |     |       |
|--------------------------------------------------------------|-----------|-----------|-----|-------|
| hypothetical protein                                         | -         | T2656968C | 177 | L158P |
| hypothetical protein                                         | -         | G2769257A | 447 | R13K  |
| Multidrug export protein MepA                                | -         | A2779493T | 456 | M30L  |
| hypothetical protein                                         | -         | T2785944A | 399 | F63L  |
| Carboxymethylenebutenolidase                                 | 3.1.1.45  | T2841580A | 246 | A79A  |
| UDP-glucose 4-epimerase                                      | 5.1.3.2   | G3003840C | 339 | V205V |
| Quinone-dependent D-lactate dehydrogenase                    | 1.1.5.12  | T3010872C | 569 | I322T |
| HTH-type transcriptional repressor ComR                      | -         | A3088378C | 214 | E78D  |
| hypothetical protein                                         | -         | C3119153G | 156 | L76V  |
| Elongation factor Tu                                         | -         | A3227707G | 397 | T178A |
| 50S ribosomal protein L1                                     | -         | C3230162T | 232 | Y21Y  |
| Transcription termination/antitermination protein NusA       | -         | C3284437T | 495 | R3R   |
| Na <sup>(+)</sup> /H <sup>(+)</sup> antiporter subunit A     | -         | C3293523G | 946 | T597T |
| Ubiquinone/menaquinone biosynthesis C-methyltransferase UbiE | 2.1.1.163 | C3304064G | 316 | Q43E  |
| Polyribonucleotide nucleotidyltransferase                    | 2.7.7.8   | A3320512T | 698 | P398P |
| hypothetical protein                                         | -         | G3424524A | 778 | D16N  |
| *                                                            | -         | T3466640C | -   | -     |
| hypothetical protein                                         | -         | A3598303C | 484 | T481P |
| S-formylglutathione hydrolase                                | 3.1.2.12  | A3598303C | 283 | K7N   |
| NADH-quinone oxidoreductase subunit G                        | 1.6.5.11  | G3648919A | 895 | M365I |

\* : SNP was located in an intergenic region

Table S4: AA substitutions in the PmrCAB and lpxA/lpxC/lpxD in *A. baumannii* LEV1449/17Ec and 39741 strains when compared to ATCC 17978 (accession number: CP000521)

|              | pmrB                                                                                                                 | pmrA                                      | pmrC                                                                                                                                               | lpxA         | lpxC                          | lpxD |
|--------------|----------------------------------------------------------------------------------------------------------------------|-------------------------------------------|----------------------------------------------------------------------------------------------------------------------------------------------------|--------------|-------------------------------|------|
| 39741        | A28T, K45Q, H54Y,<br>F65L, K67R, I76L,<br>H86N, L93F, E99Q,<br>Q110E, I112V,<br>I322V, E320D,<br><b>Y363F, H362N</b> | I18T, T44N, E133Q,<br>T168S               | V51I, L52F,<br>I54L, L55I,<br>V102F,<br>I115V,<br><b>I212V,</b><br><b>R332K</b>                                                                    | <b>Y131H</b> | <b>C120R,</b><br><b>N287D</b> | -    |
| LEV1449/17Ec | A28T, K45Q, H54Y,<br>F65L, K67R, I76L,<br>H86N, L93F, E99Q,<br>Q110E, I112V,<br>I322V, E320D,<br><b>H362N, Y363F</b> | I18T, T44N, E133Q,<br>T168S, <b>D181E</b> | V51I, L52F,<br>I54L, L55I,<br>V102F,<br>I115V,<br><b>I212V,</b><br><b>R332K,</b><br><b>Q517K,</b><br><b>A317V,</b><br><b>V135A,</b><br><b>V84I</b> | <b>Y131H</b> | <b>C120R,</b><br><b>N287D</b> | -    |

<sup>a</sup> Red indicates that these substitutions have been reported in both susceptible and resistant isolates elsewhere.

<sup>b</sup> Black color represents new substitutions that have not been reported before.

<sup>c</sup> Bold black represents shared substitutions between LEV1449/17Ec and 39741.
